# Supplementary material for: Diet and Depression during Peri- and Post-Menopause: A Scoping Review Protocol
Source: MDPI journal article supplement (doi:10.3390/mps6050091), 2023-10-02
Supplement: s1 [file s1]

## Supplementary file 2. Search strategy for all databases

Table S1. Full search strategy for Medline (*through Ovid*)

| Theme or description        | Search terms                                                                                                                                                                                                                                                                                                                                                                                                                                                                                                                                                                                                                                                                                   |
|-----------------------------|------------------------------------------------------------------------------------------------------------------------------------------------------------------------------------------------------------------------------------------------------------------------------------------------------------------------------------------------------------------------------------------------------------------------------------------------------------------------------------------------------------------------------------------------------------------------------------------------------------------------------------------------------------------------------------------------|
| Diet-related variables      | <p>1 <i>exp diet/ or exp nutritive value/ or exp hunger/</i></p> <p>2 <i>nutritional physiological phenomena/ or eating/ or feeding behavior/ or appetite regulation/ food/ or dairy products/ or dietary carbohydrates/ or dietary fats/ or dietary fiber/ or dietary proteins/ or dietary supplements/ or eggs/ or fast foods/ or fruit/ or meals/ or meat/ or micronutrients/ or nuts/ or seeds/ or vegetables/</i></p> <p>4 diet*.ti,ab,kw.</p> <p>5 nutriti*.ti,ab,kw.</p> <p>6 food.ti,ab,kw.</p> <p>7 eat*.ti,ab,kw.</p> <p>8 energy intake.ti,ab,kw.</p> <p>9 (macronutrient* or micronutrient* or nutrient*).ti,ab,kw.</p> <p><b>10 1 or 2 or 3 or 4 or 5 or 6 or 7 or 8 or 9</b></p> |
| Mental health               | <p>11 <i>exp depressive disorder/</i></p> <p>12 <i>depression/ or mood disorders/ or anxiety/ or stress, psychological/ or mental health/ or body image/</i></p> <p>13 (depression* or (depressive adj3 (condition* or disorder* or symptom*))).ti,ab,kw.</p> <p>14 anxiety.ti,ab,kw.</p> <p>15 stress*.ti,ab,kw.</p> <p>16 mental health.ti,ab,kw.</p> <p>17 (body adj3 (image* or satisfact*)).ti,ab,kw.</p> <p>18 (risk* adj2 behavior?r*).ti,ab,kw.</p> <p><b>19 11 or 12 or 13 or 14 or 15 16 or 17 or 18</b></p>                                                                                                                                                                         |
| Peri-/post-menopausal women | <p>20 <i>exp menopause/</i></p> <p>21 menopaus*.ti,ab,kw.</p> <p>22 premenopaus*.ti,ab,kw.</p> <p>23 perimenopaus*.ti,ab,kw.</p> <p>24 postmenopaus*.ti,ab,kw.</p> <p><b>25 20 or 21 or 22 or 23 or 24</b></p>                                                                                                                                                                                                                                                                                                                                                                                                                                                                                 |
| Combining search themes     | <b>26 10 and 19 and 25</b>                                                                                                                                                                                                                                                                                                                                                                                                                                                                                                                                                                                                                                                                     |
| Language                    | <b>27 limit 36 to (english or french)</b>                                                                                                                                                                                                                                                                                                                                                                                                                                                                                                                                                                                                                                                      |
| Search years                | <b>28 limit 37 to yr="1993 -Current"</b>                                                                                                                                                                                                                                                                                                                                                                                                                                                                                                                                                                                                                                                       |
| Population specifications   | <b>29 limit 38 to humans</b>                                                                                                                                                                                                                                                                                                                                                                                                                                                                                                                                                                                                                                                                   |
|                             | <b>30 limit 39 to female</b>                                                                                                                                                                                                                                                                                                                                                                                                                                                                                                                                                                                                                                                                   |

**Table S2.** Full search strategy for EMBASE (*through Ovid*)

| Theme or description        | Search terms                                                                                                                                                               |
|-----------------------------|----------------------------------------------------------------------------------------------------------------------------------------------------------------------------|
| Diet-related variables      | 1 <i>exp diet/ or exp food intake/ or exp feeding behavior/</i>                                                                                                            |
|                             | 2 <i>food/ or dairy product/ or dietary fiber/ or dietary supplement/ or egg/ or fast food/ or fat/ or fruit/ or health food/ or meat/ or nut/ or sugar/ or vegetable/</i> |
|                             | 3 <i>diet*.ti,ab,kw.</i>                                                                                                                                                   |
|                             | 4 <i>nutriti*.ti,ab,kw.</i>                                                                                                                                                |
|                             | 5 <i>food.ti,ab,kw.</i>                                                                                                                                                    |
|                             | 6 <i>eat*.ti,ab,kw.</i>                                                                                                                                                    |
|                             | 7 <i>energy intake.ti,ab,kw.</i>                                                                                                                                           |
|                             | 8 <i>(macronutrient* or micronutrient* or nutrient*).ti,ab,kw.</i>                                                                                                         |
|                             | <b>9 1 or 2 or 3 or 4 or 5 or 6 or 7 or 8</b>                                                                                                                              |
| Mental health               | 10 <i>exp mental health/</i>                                                                                                                                               |
|                             | 11 <i>mood disorder/ or depression/ or anxiety/ or mental stress/ or body image/</i>                                                                                       |
|                             | 12 <i>(depression* or (depressive adj3 (condition* or disorder* or symptom*))).ti,ab,kw.</i>                                                                               |
|                             | 13 <i>anxiety.ti,ab,kw.</i>                                                                                                                                                |
|                             | 14 <i>stress*.ti,ab,kw.</i>                                                                                                                                                |
|                             | 15 <i>mental health.ti,ab,kw.</i>                                                                                                                                          |
|                             | 16 <i>(body adj3 (image* or satisfact*)).ti,ab,kw.</i>                                                                                                                     |
|                             | 17 <i>(risk* adj2 behavio?r*).ti,ab,kw.</i>                                                                                                                                |
|                             | <b>18 10 or 11 or 12 or 13 or 14 or 15 or 16 or 17 or 18</b>                                                                                                               |
| Peri-/post-menopausal women | 19 <i>exp "menopause and climacterium"/</i>                                                                                                                                |
|                             | 20 <i>menopause/</i>                                                                                                                                                       |
|                             | 21 <i>menopaus*.ti,ab,kw.</i>                                                                                                                                              |
|                             | 22 <i>premenopaus*.ti,ab,kw.</i>                                                                                                                                           |
|                             | 22 <i>perimenopaus*.ti,ab,kw.</i>                                                                                                                                          |
|                             | 24 <i>postmenopaus*.ti,ab,kw.</i>                                                                                                                                          |
|                             | <b>25 19 or 20 or 21 or 22 or 23 or 24</b>                                                                                                                                 |
| Combining search themes     | <b>26 9 and 18 and 25</b>                                                                                                                                                  |
| Language                    | <b>27 limit 31 to (english or french)</b>                                                                                                                                  |
| Publication years           | <b>28 limit 32 to yr="1993 -Current"</b>                                                                                                                                   |
| Population specifications   | <b>29 limit 34 to humans</b>                                                                                                                                               |
|                             | <b>30 limit 35 to female</b>                                                                                                                                               |

**Table S3.** Full search strategy for PsycINFO (*through Ovid*)

| Theme or description        |    | Search terms                                                                                                                                                    |
|-----------------------------|----|-----------------------------------------------------------------------------------------------------------------------------------------------------------------|
| Diet-related variables      | 1  | <i>exp appetite/</i>                                                                                                                                            |
|                             | 2  | <i>diets/ or food intake/ or eating behavior/</i>                                                                                                               |
|                             | 3  | <i>diet*.mp.</i>                                                                                                                                                |
|                             | 4  | <i>nutriti*.mp.</i>                                                                                                                                             |
|                             | 5  | <i>food.mp.</i>                                                                                                                                                 |
|                             | 6  | <i>eat*.mp.</i>                                                                                                                                                 |
|                             | 7  | <i>energy intake.mp.</i>                                                                                                                                        |
|                             | 8  | <i>(macronutrient* or micronutrient* or nutrient*).mp.</i>                                                                                                      |
|                             | 9  | <b>1 or 2 or 3 or 4 or 5 or 6 or 7 or 8</b>                                                                                                                     |
| Mental healthc              | 10 | <i>exp mental health/</i>                                                                                                                                       |
|                             | 11 | <i>major depression/ or dysthymic disorder/ or recurrent depression/ or treatment resistant depression/ or anxiety/ or psychological stress/ or body image/</i> |
|                             | 12 | <i>(depression* or (depressive adj3 (condition* or disorder* or symptom*)))</i> .ti,ab,mp.                                                                      |
|                             | 13 | <i>anxiety</i> .ti,ab,mp.                                                                                                                                       |
|                             | 14 | <i>stress*.ti,ab,mp.</i>                                                                                                                                        |
|                             | 15 | <i>mental health</i> .ti,ab,mp.                                                                                                                                 |
|                             | 16 | <i>(body adj3 (image* or satisfact*))</i> .ti,ab,mp.                                                                                                            |
|                             | 17 | <i>(risk* adj2 behavio?r*)</i> .ti,ab,mp.                                                                                                                       |
|                             | 18 | <b>12 or 13 or 14 or 15 or 16 or 17 or 18 or 19 or 20 or 21 or 22</b>                                                                                           |
| Peri-/post-menopausal women | 19 | <i>Menopause/</i>                                                                                                                                               |
|                             | 20 | <i>menopaus*.ti,ab,mp.</i>                                                                                                                                      |
|                             | 21 | <i>premenopaus*.ti,ab,mp.</i>                                                                                                                                   |
|                             | 22 | <i>perimenopaus*.ti,ab,mp.</i>                                                                                                                                  |
|                             | 23 | <i>postmenopaus*.ti,ab,mp.</i>                                                                                                                                  |
|                             | 24 | <b>24 or 25 or 26 or 27 or 28</b>                                                                                                                               |
| Combining search themes     | 25 | <b>11 and 23 and 28</b>                                                                                                                                         |
| Language                    | 26 | <b>limit 21 to (english or french)</b>                                                                                                                          |
| Publication years           | 27 | <b>limit 31 to yr="1993 -Current"</b>                                                                                                                           |
| Population specifications   | 28 | <b>limit 32 to human</b>                                                                                                                                        |
|                             | 29 | <b>limit 33 to female</b>                                                                                                                                       |

Table S4. Full search strategy for the Food Science and Technology Abstracts Database (*through Ovid*)

| Theme or description        | Search terms                                                                                  |
|-----------------------------|-----------------------------------------------------------------------------------------------|
| Diet-related variables      | 1 <i>exp diet/ or exp eating habits/ or exp nutrients/</i>                                    |
|                             | 2 <i>appetite/ or hunger/ or satiety/</i>                                                     |
|                             | 3 <i>diet*.ti,ab,mp.</i>                                                                      |
|                             | 4 <i>nutri*.ti,ab,mp.</i>                                                                     |
|                             | 5 <i>food*.ti,ab,mp.</i>                                                                      |
|                             | 6 <i>eat*.ti,ab,mp.</i>                                                                       |
|                             | 7 <i>energy intake.ti,ab,mp.</i>                                                              |
|                             | 8 <i>(macronutrient* or micronutrient* or nutrient*).mp.</i>                                  |
|                             | <b>9 1 or 2 or 3 or 4 or 5 or 6 or 7 or 8</b>                                                 |
| Mental health               | 10 <i>exp human psychology/</i>                                                               |
|                             | 11 <i>mental health/</i>                                                                      |
|                             | 12 <i>(depression* or (depressive adj3 (condition* or disorder* or symptom*))) .ti,ab,mp.</i> |
|                             | 13 <i>anxiety.ti,ab,mp.</i>                                                                   |
|                             | 14 <i>stress*.ti,ab,mp.</i>                                                                   |
|                             | 15 <i>mental health.ti,ab,mp.</i>                                                             |
|                             | 16 <i>(body adj3 (image* or satisfact*)).ti,ab,mp.</i>                                        |
|                             | 17 <i>(risk* adj2 behavio?r*).ti,ab,mp.</i>                                                   |
|                             | <b>18 10 or 11 or 12 or 13 or 14 or 15 or 16 or 17</b>                                        |
| Peri-/post-menopausal women | 19 <i>menopause/</i>                                                                          |
|                             | 20 <i>menopaus*.ti,ab,mp.</i>                                                                 |
|                             | 21 <i>premenopaus*.ti,ab,mp.</i>                                                              |
|                             | 22 <i>perimenopaus*.ti,ab,mp.</i>                                                             |
|                             | 23 <i>postmenopaus*.ti,ab,mp.</i>                                                             |
|                             | <b>24 21 or 22 or 23 or 24 or 25</b>                                                          |
| Combining search themes     | <b>25 11 and 20 and 26</b>                                                                    |
| Language                    | <b>26 limit 27 to (english or french)</b>                                                     |
| Publication years           | <b>27 limit 28 to yr="1993 -Current"</b>                                                      |
